# Supplementary material
Source: publisher figshare collection journal article supplement (https://frontiersin.figshare.com/ndownloader/files/22823930)
Supplement: Supplementary file 1 [file 22823930]

**Supplementary Information**

**Photoacclimation to constant and changing light conditions in a benthic diatom**

Filip Pniewski*, Iwona Piasecka-Jędrzejak

Institute of Oceanography, University of Gdańsk, Al. Piłsudskiego 46, 81-378 Gdynia, Poland

*Correspondence

Dr. Filip Pniewski

filip.pniewski@ug.edu.pl


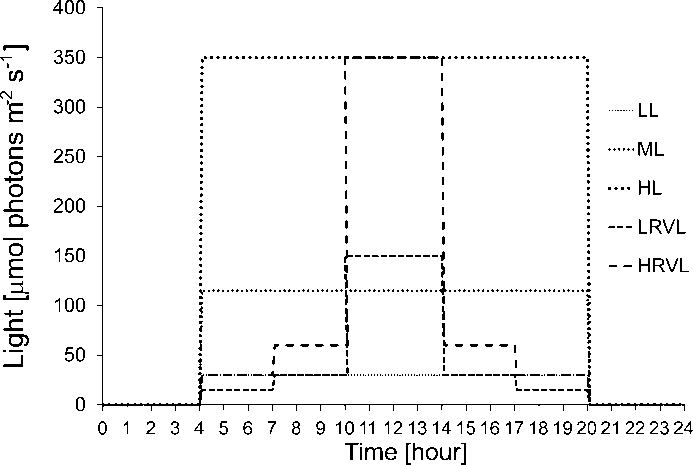


**Figure 1S** Various light regimes used in the experiments: constant light: i.e., low light (LL) – 30, medium light (ML) – 115, high light (HL) – 350 mol photons m-2 s-1, and variable light: lower range variable light (LRVL), i.e., 15, 30, 150 mol photons m-2 s-1; and higher range variable light (HRVL), i.e., 30, 60, 350 mol photons m-2 s-1. Cultures were illuminated for 16h. Under variable light conditions, i.e., LRVL and HRVL, low and medium light were applied for 3h each, subsequently high light was applied for 4h. Next medium and low light were applied, again for 3h each.

**Table 1S** The results of the analysis of variance (ANOVA) and Tukey HSD test post-hoc comparison for specific growth rate (, d-1) in *N.* cf. *aurariae* grown under various light regimes, i.e., constant light: low light (LL) – 30, medium light (ML) – 115, high light (HL) – 350 mol photons m-2 s-1, lower range variable light (LRVL), i.e., irradiance varying within the range 15-150 mol photons m-2 s-1, and higher range variable light (HRVL), i.e., irradiance varying within the range 30-350 mol photons m-2 s-1. Letters denote results of Tukey test.

|  | ANOVA | | | Tukey HSD test | | |  |  |
| --- | --- | --- | --- | --- | --- | --- | --- | --- |
|  | df | MS | F | LL | ML | HL | LRVL | HRVL |
| all light regimes | 4 | 0.01 | 64.85*** | a | ab | b | b | c |

d.f. – degrees of freedom

*** - p<0.001

**Table 2S** The results of the analysis of variance (ANOVA) and Tukey HSD test post-hoc comparison for cellular pigment content [pg cell-1], the xanthophylls pool ((Dd+Dt)/Chl*a*) and the de-epoxidation state (Dt/(Dd+Dt)) measured in *N.* cf. *aurariae* grown under different light regimes: constant light (CL), i.e., 30, 115, 350 mol photons m-2 s-1, lower range variable light (LRVL), i.e., 15, 30, 150 mol photons m-2 s-1, and higher range variable light (HRVL), i.e., 30, 60, 350 mol photons m-2 s-1. Data show the mean of 3 independent cultures ± standard error. Letters denote results of Tukey test.

|  | Light levels | | | ANOVA | | |
| --- | --- | --- | --- | --- | --- | --- |
| Constant light (CL) | | | | | | |
|  | 30 | 115 | 350 | df | F | |
| Chl*a* | 0.732±0.072a | 0.468±0.064b | 0.418±0.042b | 2 | 7.63* | |
| Chl*c* | 0.132±0.020 | 0.124±0.056 | 0.067±0.007 | 2 | 1.10 n.s. | |
| Fuco | 0.634±0.071a | 0.385±0.050b | 0.341±0.026b | 2 | 9.16* | |
| (Dd+Dt) | 0.039±0.003a | 0.121±0.035a | 0.254±0.033b | 2 | 15.18* | |
| (Dd+Dt)/Chl*a* | 0.053±0.005a | 0.249±0.041b | 0.603±0.032c | 2 | 84.89*** | |
| Dt/(Dd+Dt) | 0.183±0.009a | 0.176±0.012a | 0.370±0.019b | 2 | 60.54* | |
| -car | 0.009±0.001 | 0.010±0.002 | 0.014±0.003 | 2 | 1.75 n.s. | |
| Low range variable light (LRVL) | | | |  |  |  |
|  | 15 | 30 | 150 |  |  |  |
| Chl*a* | 0.612±0.088 | 0.587±0.059 | 0.764±0.136 | 2 | 0.93 n.s. | |
| Chl*c* | 0.119±0.019 | 0.133±0.007 | 0.131±0.011 | 2 | 0.33 n.s. | |
| Fuco | 0.518±0.078 | 0.577±0.029 | 0.640±0.096 | 2 | 0.69 n.s. | |
| (Dd+Dt) | 0.080±0.016 | 0.099±0.001 | 0.127±0.016 | 2 | 3.31 n.s. | |
| (Dd+Dt)/Chl*a* | 0.130±0.013 | 0.172±0.016 | 0.169±0.013 | 2 | 2.64 n.s. | |
| Dt/(Dd+Dt) | 0.174±0.009 a | 0.291±0.012 b | 0.703±0.012 c | 2 | 603.70*** | |
| -car | 0.014±0.005 | 0.025±0.002 | 0.030±0.004 | 2 | 3.96 n.s. | |
| High range variable light (HRVL) | | | |  |  |  |
|  | 30 | 60 | 350 |  |  |  |
| Chl*a* | 0.358±0.011ab | 0.323±0.007a | 0.413±0.028b | 2 | 6.31* | |
| Chl*c* | 0.081±0.010 | 0.072±0.004 | 0.092±0.006 | 2 | 1.98 n.s. | |
| Fuco | 0.404±0.025ab | 0.329±0.007a | 0.431±0.023b | 2 | 6.82* | |
| (Dd+Dt) | 0.114±0.002a | 0.096±0.002b | 0.127±0.004a | 2 | 25.03* | |
| (Dd+Dt)/Chl*a* | 0.321±0.016 | 0.296±0.002 | 0.309±0.015 | 2 | 0.94 n.s. | |
| Dt/(Dd+Dt) | 0.246±0.019a | 0.356±0.049a | 0.667±0.021b | 2 | 45.45*** | |
| -car | 0.010±0.001 | 0.005±0.0003 | 0.012±0.004 | 2 | 2.62 n.s. | |

d.f. – degrees of freedom

* - p<0.05

*** - p<0.001

n.s. – not significant





**Figure 2S** Changes in the shape of P-E curves (gross photosynthesis) in *N.* cf. *aurariae* grown under different light regimes: constant light (**A**, **B**) (open symbols), i.e., low light (LL) – 30 (○), medium light (ML) – 115 (□), high light (HL) – 350 (∆) mol photons m-2 s-1, lower range variable light (**C**, **D**) (grey symbols), i.e., low light (LL) – 15 (○), medium light (ML) – 30 (□), high light (HL) – 150 (∆) mol photons m-2 s-1, higher range variable light (**E**, **F**) (black symbols), i.e., low light (LL) – 30 (○), medium light (ML) – 60 (□), high light (HL) – 350 (∆) mol photons m-2 s-1. In panels (**A**), (**C**), (**E**) photosynthetic rates are expressed per cell, while in panels (**B**), (**D**), (**F**) per Chl*a* unit. Each data point is the mean of 3 independent cultures, error bars represent standard error.

**Table 3S** The results of the analysis of variance (ANOVA) and Tukey HSD test post-hoc comparison on photosynthetic parameters (the photosynthetic capacity (GPmax), the maximum light utilization coefficient () normalized per cell and Chl*a* unit, and the light saturation index (Ek)) measured in *N.* cf. *aurariae* grown under different light regimes: constant light (CL), i.e., 30, 115, 350 mol photons m-2 s-1, lower range variable light (LRVL), i.e., 15, 30, 150 mol photons m-2 s-1, and higher range variable light (HRVL), i.e., 30, 60, 350 mol photons m-2 s-1. Data show the mean of 3 independent cultures ± standard error. Letters denote results of Tukey test.

|  | Light levels | | | ANOVA | | |
| --- | --- | --- | --- | --- | --- | --- |
| Constant light (CL) | | | | | | |
|  | 30 | 115 | 350 | df | F | |
| GPmax/cell† | 84.3±5.1a | 57.3±2.4b | 21.8±2.5c | 2 | 76.82*** | |
| GPmax/Chl*a*+ | 118.5±17.5a | 125.6±14.4a | 53.3±8.4b | 2 | 8.14* | |
| /cell* | 0.300±0.032a | 0.176±0.011a | 0.141±0.013b | 2 | 16.26* | |
| /Chl*a*# | 0.422±0.077 | 0.406±0.079 | 0.340±0.032 | 2 | 0.51n.s. | |
| Ek *a* | 284.1±17.1a | 347.3±27.0a | 125.0±23.1b | 2 | 50.42* | |
| Low range variable light (LRVL) | | | |  |  |  |
|  | 15 | 30 | 150 |  |  |  |
| GPmax/cell† | 120.6±12.2 | 121.9±5.0 | 103.2±8.7 | 2 | 1.32 n.s. | |
| GPmax/Chl*a*+ | 201.9±21.7 | 213.7±23.8 | 139.4±13.9 | 2 | 3.89 n.s. | |
| /cell* | 0.626±0.098 | 0.646±0.016 | 0.773±0.066 | 2 | 1.34 n.s. | |
| /Chl*a*# | 1.122±0.360 | 1.062±0.056 | 1.041±0.085 | 2 | 0.04 n.s. | |
| Ek *a* | 203.3±18.7 a | 189.1±10.3 a | 133.6±4.4 b | 2 | 8.55* | |
| High range variable light (HRVL) | | | |  |  |  |
|  | 30 | 60 | 350 |  |  |  |
| GPmax/cell† | 69.7±2.2 | 70.2±1.5 | 65.0±3.6 | 2 | 1.22 n.s. | |
| GPmax/Chl*a*+ | 195.5±10.1ab | 217.5±9.2a | 158.1±1.5b | 2 | 8.32* | |
| /cell* | 0.415±0.030 | 0.448±0.014 | 0.469±0.019 | 2 | 1.47 n.s. | |
| /Chl*a*# | 1.161±0.073 a | 1.379±0.051b | 1.140±0.039a | 2 | 5.50* | |
| Ek *a* | 169.5±12.1 a | 157.9±4.7 a | 138.7±6.0 b | 2 | 3.54* | |

† molO2 109cell-1 h-1

+ molO2 mg-1Chl*a* h-1

* molO2 109cell-1 h-1 [mol photons m-2 s-1]-1

# molO2 mg-1Chl*a* h-1 [mol photons m-2 s-1]-1

*a* mol photons m-2 s-1

d.f. – degrees of freedom

* - p<0.05

*** - p<0.001

n.s. – not significant

**Table 4S** The results of the analysis of variance (ANOVA) and Tukey HSD test post-hoc comparison on fluorescence parameters (the maximum quantum yield of photosystem II (Fv/Fm), the non-photochemical quenching (NPQ)) measured in *N.* cf. *aurariae* grown under different light regimes: constant light (CL), i.e., 30, 115, 350 mol photons m-2 s-1, lower range variable light (LRVL), i.e., 15, 30, 150 mol photons m-2 s-1, and higher range variable light (HRVL), i.e., 30, 60, 350 mol photons m-2 s-1. Data show the mean of 3 independent cultures ± standard error, unless stated otherwise (number in brackets). Letters denote results of Tukey test.

|  | Light levels | | | ANOVA | | |
| --- | --- | --- | --- | --- | --- | --- |
| Constant light (CL) | | | | | | |
|  | 30 | 115 | 350 | d.f. | F | |
| Fv/Fm | 0.688±0.007a | 0.654±0.009b | 0.577±0.019c | 2 | 41.22*** | |
| NPQ | 0.07±0.01a | 1.67±0.05b | 3.65±0.05c | 2 | 2238.8*** | |
| Low range variable light (LRVL) | | | |  |  |  |
|  | 15 | 30 | 150 |  |  |  |
| Fv/Fm | 0.714±0.005a | 0.679±0.009a | 0.594±0.017b | 2 | 13.83*. | |
| NPQ | - | 0.06 (2) | 1.39±0.14 |  | - | |
| High range variable light (HRVL) | | | |  |  |  |
|  | 30 | 60 | 350 |  |  |  |
| Fv/Fm | 0.675±0.005a | 0.613±0.009b | 0.518±0.018c | 2 | 28.74*** | |
| NPQ | 0.023 (1) | 0.44±0.18 | 2.87±0.17 |  | - | |

d.f. – degrees of freedom

* - p<0.05

*** - p<0.001

n.s. – not significant
